# Supplementary material for: Genetic diversity of stilbene metabolism in Vitis sylvestris
Source: PubMed Central journal article supplement (PMC4449542; doi:10.1093/jxb/erv137), 2015-04-06
Supplement: supp_erv137_jexbot141622_file001.pdf [file supp_erv137_jexbot141622_file001.pdf]

**Genetic diversity of stilbene metabolism in *Vitis*  
*sylvestris***

**Dong Duan, David Halter, Raymonde Baltenweck, Christine Tisch,  
Viktoria Tr öster, Andreas Kortekamp, Philippe Hugueney and Peter  
Nick**

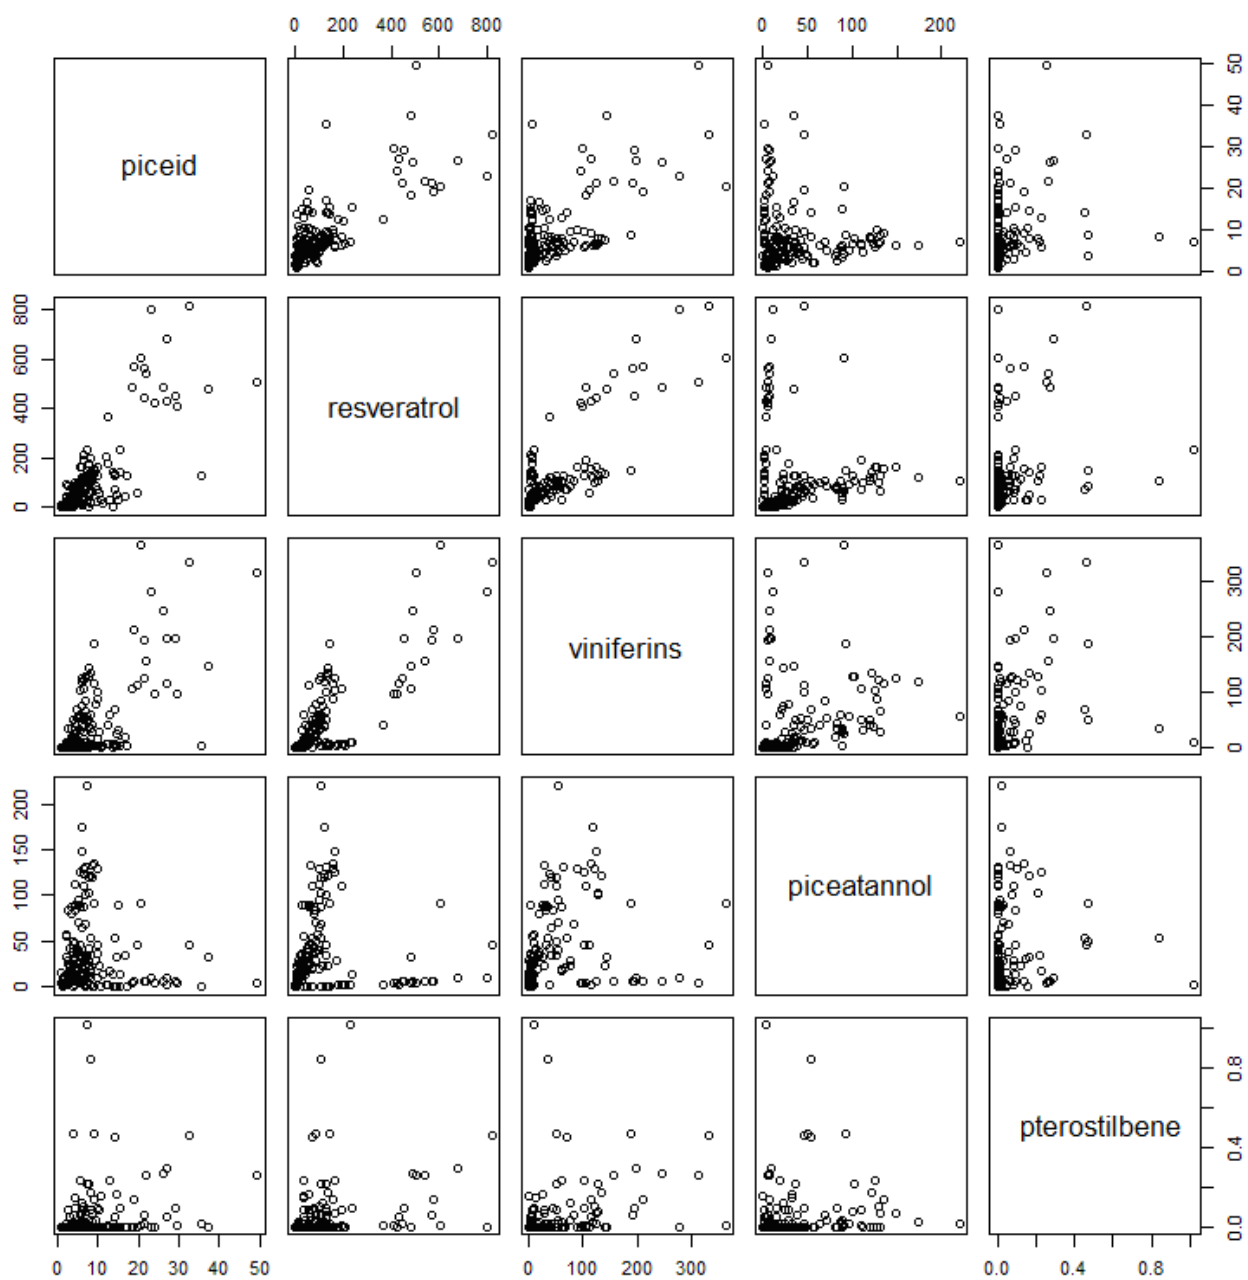

**Figure S1.** Correlations between the amounts of piceid, resveratrol, viniferins, piceatannol and pterostilbene.

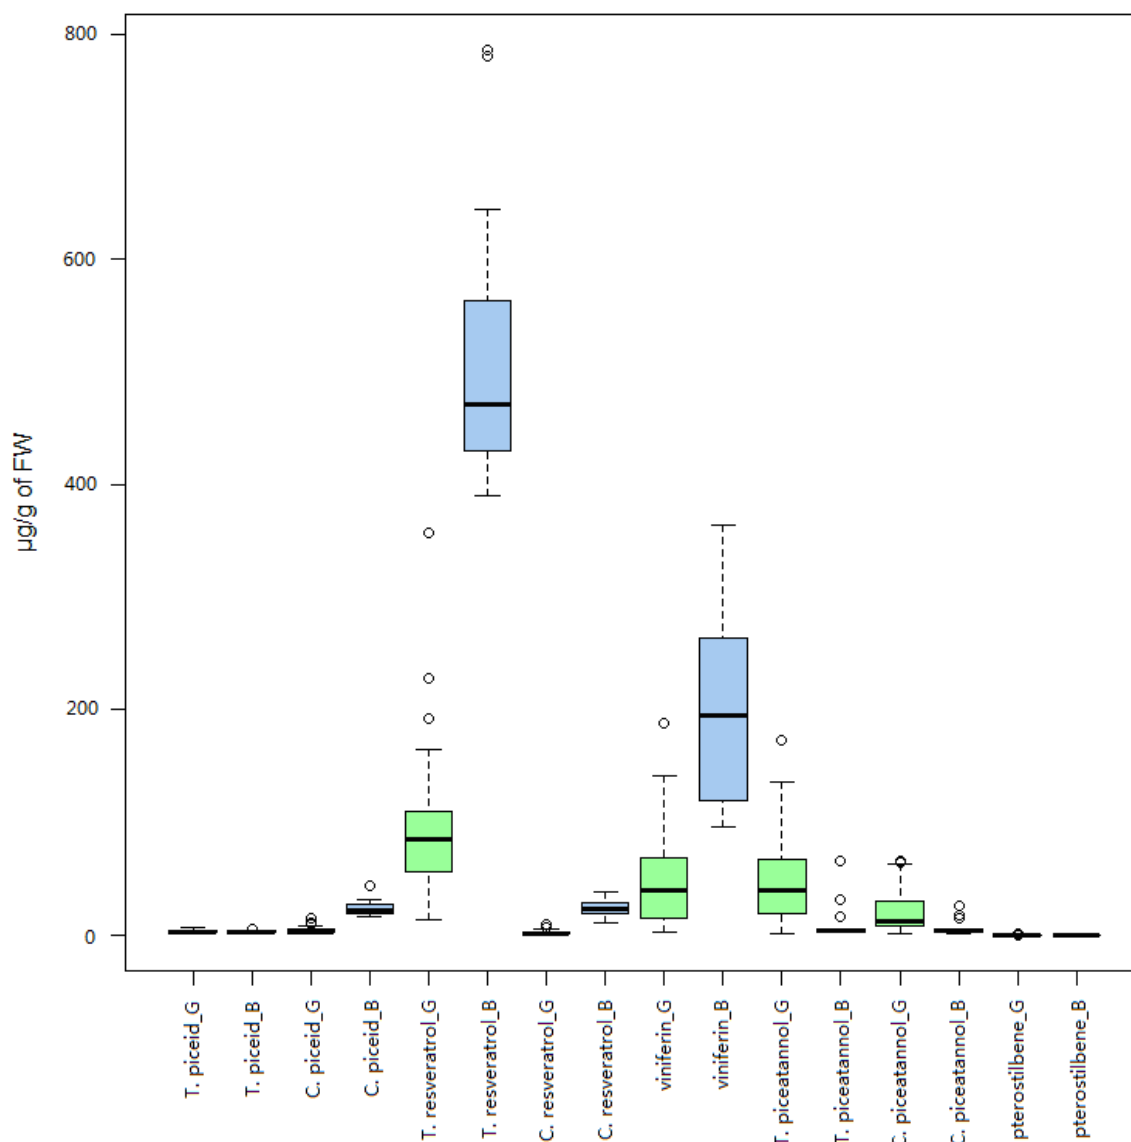

**Figure S2.** Boxplots of the amounts of each stilbene in the blue (B) and in the green (G) cluster. The amounts of trans-piceid and pterostilbene are not statistically different in both clusters (t-test,  $p$ -val=0.6951 and 0.006 respectively), whereas, cis-piceid, trans-resveratrol, cis-resveratrol, viniferins, trans-piceatannol, cis-piceatannol are statistically differently accumulated in the blue cluster in comparison to the green one (t-test,  $p$ -val= $5.51 \times 10^{-9}$ ,  $3.1 \times 10^{-10}$ ,  $1.77 \times 10^{-9}$ ,  $5.37 \times 10^{-6}$ ,  $4.71 \times 10^{-8}$  and  $7.48 \times 10^{-7}$ , respectively).

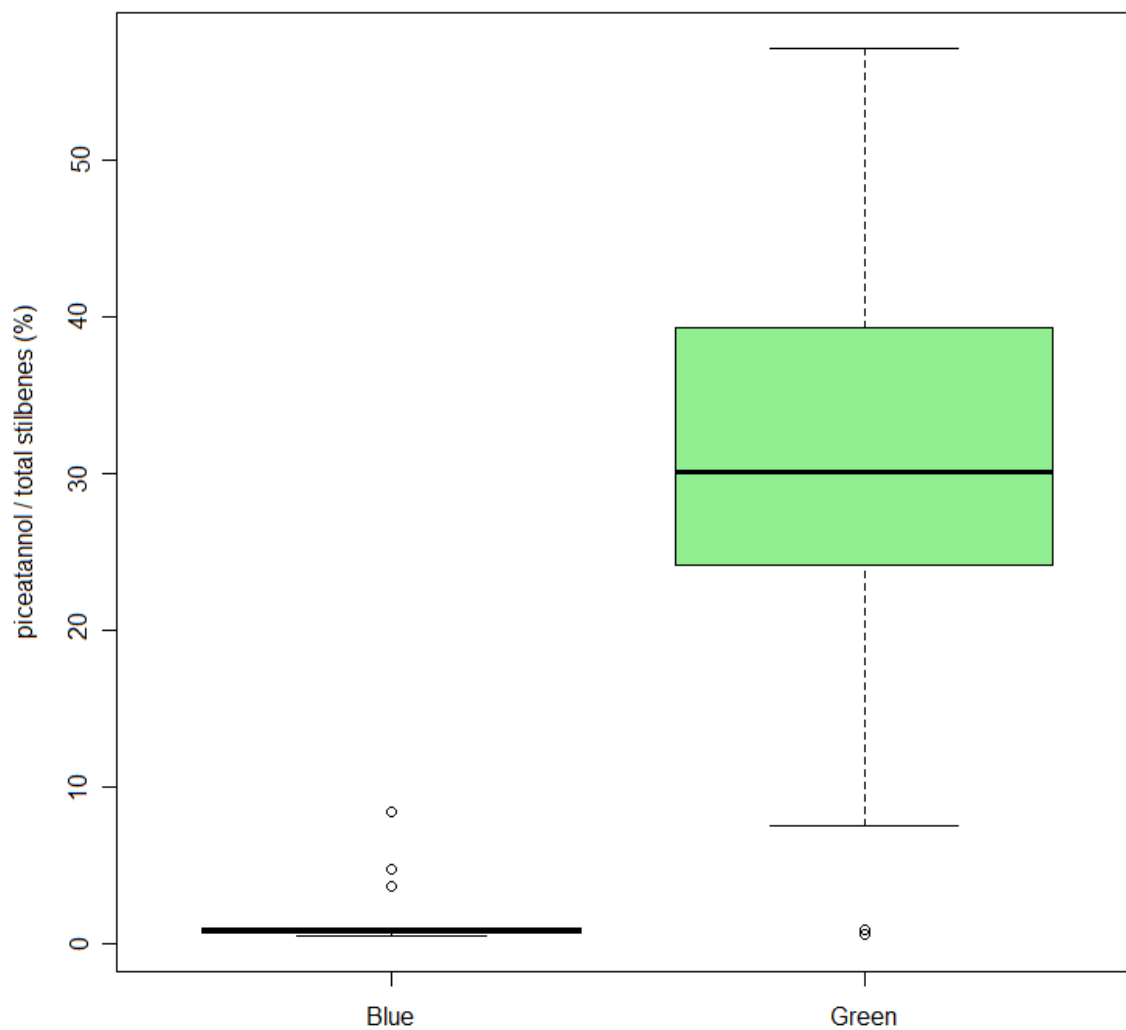

**Figure S3.** Boxplots of the piceatannol/total stilbene ratio in the blue and green cluster. The ratio is statistically greater in the green cluster in comparison to the blue one (t-test,  $p\text{-val} < 2.2 \times 10^{-16}$ ).

**Table S1.** Correlations between the amounts of piceid, resveratrol, viniferins, piceatannol and pterostilbene.

|               | piceid | resveratrol | viniferins | piceatannol | pterostilbene |
|---------------|--------|-------------|------------|-------------|---------------|
| piceid        | 1.00   | 0.81        | 0.74       | -0.36       | 0.16          |
| resveratrol   | 0.81   | 1.00        | 0.83       | -0.31       | 0.18          |
| viniferins    | 0.74   | 0.83        | 1.00       | -0.05       | 0.20          |
| piceatannol   | -0.37  | -0.31       | -0.05      | 1.00        | -0.11         |
| pterostilbene | 0.16   | 0.18        | 0.20       | -0.11       | 1.00          |

**Table S2.** The construction of the stilbenes for each component in principal component analysis.

|                   | Comp.1 | Comp.2 |
|-------------------|--------|--------|
| trans-piceid      | -0.395 | 0.282  |
| cis-piceid        | -0.323 | -0.395 |
| trans-resveratrol | -0.433 | -0.231 |
| cis-resveratrol   | -0.401 | -0.339 |
| viniferin         | -0.449 |        |
| trans-piceatannol | -0.239 | 0.533  |
| cis-piceatannol   | -0.265 | 0.533  |
| pterostilbene     | -0.251 |        |

**Table S3.** Primers list and literature references used for semi-quantitative RT-PCR and quantitative real-time PCR for this study.

| <b>Name</b>   | <b>GeneBank<br/>accession no.</b> | <b>Primer sequence 5'-3'</b>                                                   | <b>Reference</b>             |
|---------------|-----------------------------------|--------------------------------------------------------------------------------|------------------------------|
| EF1- $\alpha$ | EC959059                          | Sense: 5'-3' TGTCATGTTGTGTCGTGTCCT<br>Antisense: 5'-3' CCAAATATCCGGAGTAAAAGA   | This paper                   |
| PAL           | X75967                            | Sense: 5'-3' TGCTGACTGGTGAAAAGGTG<br>Antisense: 5'-3' CGTTCCAAGCACTGAGACAA     | Belhadj <i>et al.</i> (2008) |
| RS            | AF274281                          | Sense: 5'-3' TGGAAGCAACTAGGCATGTG<br>Antisense: 5'-3' GTGGCTTTTTTCCCCCTTTAG    | This paper                   |
| StSy          | X76892                            | Sense: 5'-3' CCAATGTGCCCACTTTAAT<br>Antisense: 5'-3' CTGGGTGAGCAATCCAAAAT      | This paper                   |
| CHS           | AB066274                          | Sense: 5'-3' GGTGCTCCACAGTGTGTCTACT<br>Antisense: 5'-3' TACCAACAAGAGAAGGGGAAAA | Belhadj <i>et al.</i> (2008) |

**Table S4.** Stomatal density (as frequency of guard cell pairs per total number of epidermal cells) is independent of leaf expansion, leaf differentiation, and year. n indicates the number of leaves collected from different plants. From each leaf between 200-600 stomata were scored to determine stomatal density.

| <b>Genotype</b>            | <b>parameter</b>            | <b>Stomatal density [fraction of guard cells]</b> |
|----------------------------|-----------------------------|---------------------------------------------------|
|                            |                             |                                                   |
| <b>Ke110</b>               | <b>Leaf expansion</b>       |                                                   |
| n = 8                      | Just emerged                | 0.092 ± 0.006                                     |
| n = 4                      | During expansion            | 0.089 ± 0.005                                     |
| n = 16                     | Fully expanded              | 0.092 ± 0.004                                     |
|                            |                             |                                                   |
| <b>Ke83</b>                | <b>Leaf differentiation</b> |                                                   |
| n = 8                      | Small, green                | 0.060 ± 0.004                                     |
| n = 4                      | Medium size, green          | 0.063 ± 0.003                                     |
| n = 4                      | Large, green                | 0.062 ± 0.011                                     |
| n = 16                     | Large, anthocyanin          | 0.065 ± 0.002                                     |
|                            |                             |                                                   |
| <b><i>V. rupestris</i></b> | <b>Year</b>                 |                                                   |
| n = 4                      | Year 1                      | 0.099 ± 0.005                                     |
| n = 16                     | Year 2                      | 0.102 ± 0.003                                     |
